# Supplementary material
Source: MDPI journal article supplement (https://www.mdpi.com/2227-9040/10/11/487)
Supplement: s1 [file s1]

# Detection of Azo Dyes Using Carbon Dots from Olive Mill Wastes

Diogo A. Sousa <sup>1,2,3</sup>, Mário N. Berberan-Santos, <sup>3</sup> and José V. Prata <sup>1,2,\*</sup>

<sup>1</sup> Department of Chemical Engineering, Instituto Superior de Engenharia de Lisboa, Instituto Politécnico de Lisboa, 1959-007 Lisbon, Portugal

<sup>2</sup> CQ-VR-Centro de Química-Vila Real, Universidade de Trás-os-Montes e Alto Douro, 5001-801 Vila Real, Portugal

<sup>3</sup> BSIRG-iBB-Institute for Bioengineering and Biosciences, and Associate Laboratory i4HB—Institute for Health and Bioeconomy, Instituto Superior Técnico, Universidade de Lisboa, 1049-001 Lisbon, Portugal;

\* Correspondence: [jvprata@deq.isel.ipl.pt](mailto:jvprata@deq.isel.ipl.pt)

## Supplementary Materials

### Table of Contents

*Procedure for the synthesis of WP-CDs*

*FTIR, XPS, <sup>13</sup>C NMR spectra and STEM image of WP-CDs: Figure S1*

*Effect of ionic strength on photoluminescence: Figure S2*

*Detection of methyl orange in tap water: Table S1*

### Procedure for the synthesis of WP-CDs [1]

The wet pomace, collected from an industrial olive extraction unit (olive mill), was dried at 105 °C until constant weight (~48 h) and then extracted with *n*-hexane in a Soxhlet apparatus during 4 h. After drying, the extracted pomace (EP; 8.0 g), dispersed in water (50 mL), and ethylenediamine (EDA; 712  $\mu$ L; EDA/EP mass ratio = 0.08) were fed into an inox vessel of a high-pressure reactor (Parr model 4560, Parr Instruments Company, Moline, Ill, USA), deaerated by nitrogen flushing and stirred at 250 rpm in a nitrogen atmosphere. The contents of the reactor were heated with a temperature gradient of 15 °C/min until 250 °C and kept at this temperature for 72h. The reaction mixture was cooled to ca. 25 °C and filtered through a 0.20  $\mu$ m cellulose membrane under vacuum. The filtrate was extracted five times with  $\text{CH}_2\text{Cl}_2$  (25 mL). A brown aqueous solution of WP-CDs (ca. 16 mg/mL) was then obtained after the smooth removal of the residual organic solvent. The mass yield of WP-CDs was typically around 10%.

### Structural and morphological characterization of WP-CDs

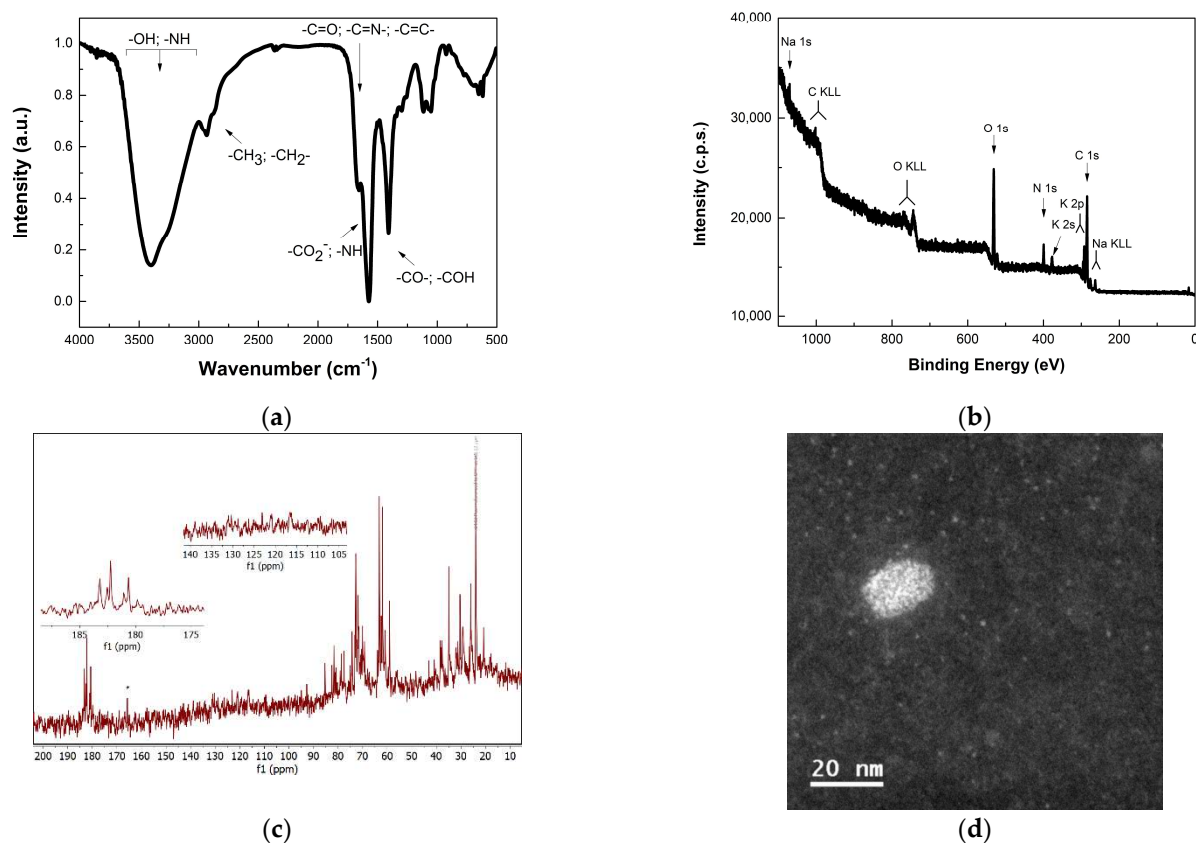

**Figure S1.** FTIR (a), wide XPS (b) <sup>13</sup>C NMR (c) spectra, and STEM micrograph (d) of WP-CDs. Full characterization details may be found in [1].

## Effect of ionic strength on photoluminescence

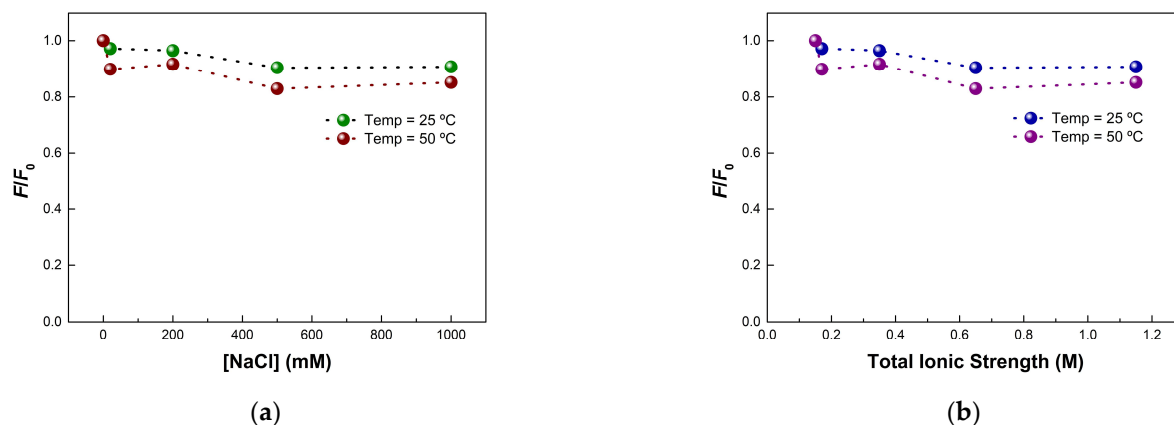

**Figure S2.** Effect of added NaCl (a) and total ionic strength (b) on the photoluminescence of WP-CDs (0.1 mg/mL) in phosphate buffer (50 mM, pH = 7.2) at 25 °C and 50 °C. Emission monitored at 426 nm upon excitation at 340 nm. Dotted lines drawn as an eye guide.

## Detection of methyl orange (MO) in tap water

**Table S1.** Detection of MO in tap water.<sup>1</sup>

| Sample | [MO] spiked ( $\mu$ M) | [MO] found ( $\mu$ M) | Recovery (%)    | RSD (%; n = 3) |
|--------|------------------------|-----------------------|-----------------|----------------|
| 1      | 0                      | Not detected          | -               | -              |
| 2      | 10                     | $10.38 \pm 0.17$      | $103.8 \pm 1.7$ | 1.63           |
| 3      | 15                     | $14.12 \pm 0.11$      | $94.1 \pm 0.7$  | 0.76           |
| 4      | 20                     | $20.77 \pm 0.02$      | $103.8 \pm 0.1$ | 0.09           |

<sup>1</sup> WP-CDs probe was used at a concentration of 0.1 mg/mL; tap water from the Lisbon public water system (EPAL) [2]. Emission monitored at 426 nm upon excitation at 340 nm.

## References

- Sousa, D.A.; Ferreira, L.F.V.; Fedorov, A.A.; Rego, A.M.B.; Ferraria, A.M.; Cruz, A.B.; Berberan-Santos, M.N.; Prata, J.V. Luminescent Carbon Dots from Wet Olive Pomace: structural insights, photophysical properties and cytotoxicity. *Molecules* **2022**, *27*, 6768. <https://doi.org/10.3390/molecules27196768>.
- Dados da Qualidade da Água/Torneiras da Cidade de Lisboa. EPAL, Grupo Águas de Portugal, 2022. <https://www.epal.pt/EPAL/menu/%C3%A1gua/divulga%C3%A7%C3%A3o-de-dados-da-qualidade-da-%C3%A1gua/controlo-legal/torneiras-na-cidade-de-lisboa> (accessed on 3 November 2022).
